# Supplementary material for: Characterizing the Biopotency of Truncated Transgene Variants in rAAV8 viral vectors: Essential Considerations for Gene Therapy Applications
Source: Research Square preprint supplement (doi:10.21203/rs.3.rs-4043201/v1), 2024-04-04
Supplement: Supplementary file 1 [file 762b0682f9f7bdcd89b77cfa.docx]

BMC Biotechnology – Open Access

Supplemental Materials

Research Article:

Characterizing the Biopotency of Truncated Transgene Variants in rAAV viral vectors: Essential Considerations for Gene Therapy Applications

Christian Fiedler1, Johannes Lengler2, Bernadette Gruber2, Marcus Scheindel1, Carsten Büngener3, Dominik, Mittergradnegger1,Marian Bendik², Barbara Kraus2 and Juan A. Hernandez Bort2

1Biotherapeutics Process Development Europe, Baxalta Innovations GmbH, a part of Takeda companies, Industriestrasse 131, 1221 Vienna, Austria

2Gene Therapy Process Development, Baxalta Innovations GmbH, a part of Takeda companies, Uferstraße 15, 2304 Orth an der Donau, Austria

3Analytical Development Europe, Baxalta Innovations GmbH, a part of Takeda companies, Benatzkygasse 2-8, 1221 Vienna, Austria

*Corresponding author: juan.hernandezbort@takeda.com


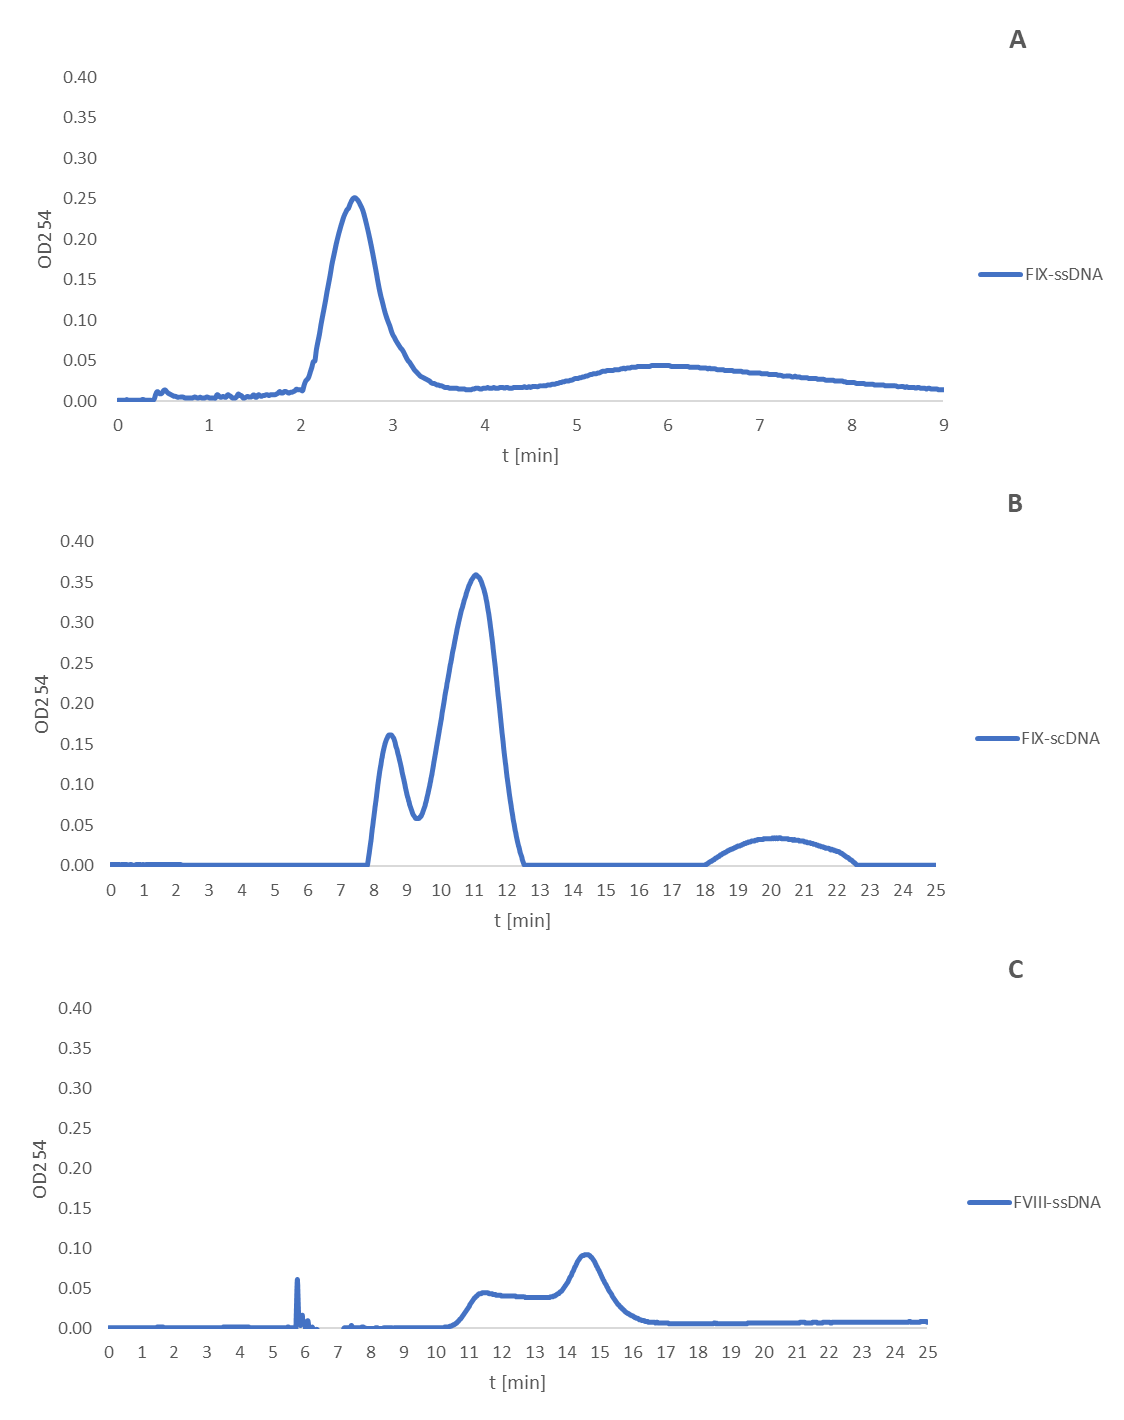


Suppl. Figure 1: Complete Elution Profile via Ultracentrifugation of rAAV8 Containing Various DNA Constructs: (a) FIX-ssDNA, (b) FIX-scDNA, and (c) FVIII-ssDNA. The elution characteristics were influenced by the specific DNA transgene configuration. The absorption at OD254 varied based on the quantity of material subjected to ultracentrifugation.


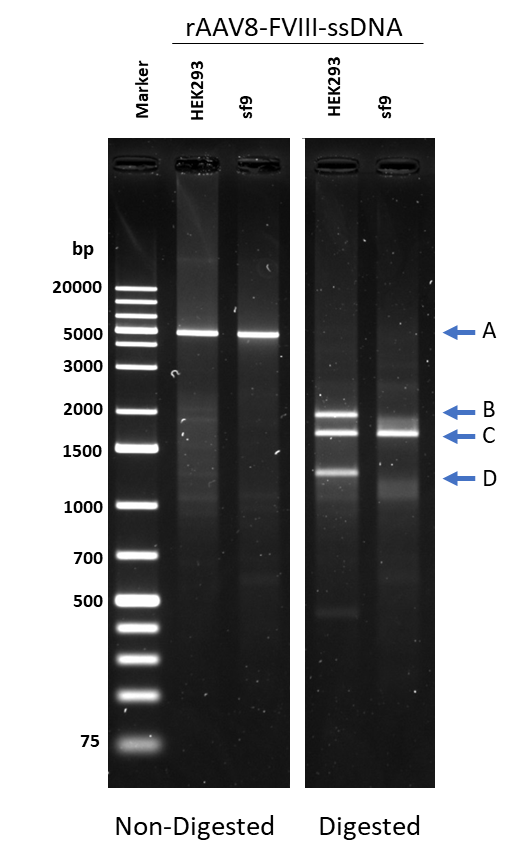


Suppl. Figure 2: Comparative Analysis of rAAV8-FVIII-ssDNA Produced in HEK293 Human Cells vs. Sf9 Baculovirus Insect Cells. The image illustrates an agarose gel with lanes displaying the molecular profiles of non-digested and restriction enzyme-digested samples.: The arrows represent**: A** - Genomic DNA, **B** - DNA containing 3' ITR, **C** - DNA containing transgene, **D** - DNA containing 5' ITR.
